# Supplementary figures and images for: Engaging Mothers With Depressive Symptoms in Care: Results of a Randomized Controlled Trial in Head Start
Source: Atypon-hosted journal article supplement (doi:10.1176/appi.ps.201800173), 2018-09-26

**CONSORT Diagram**

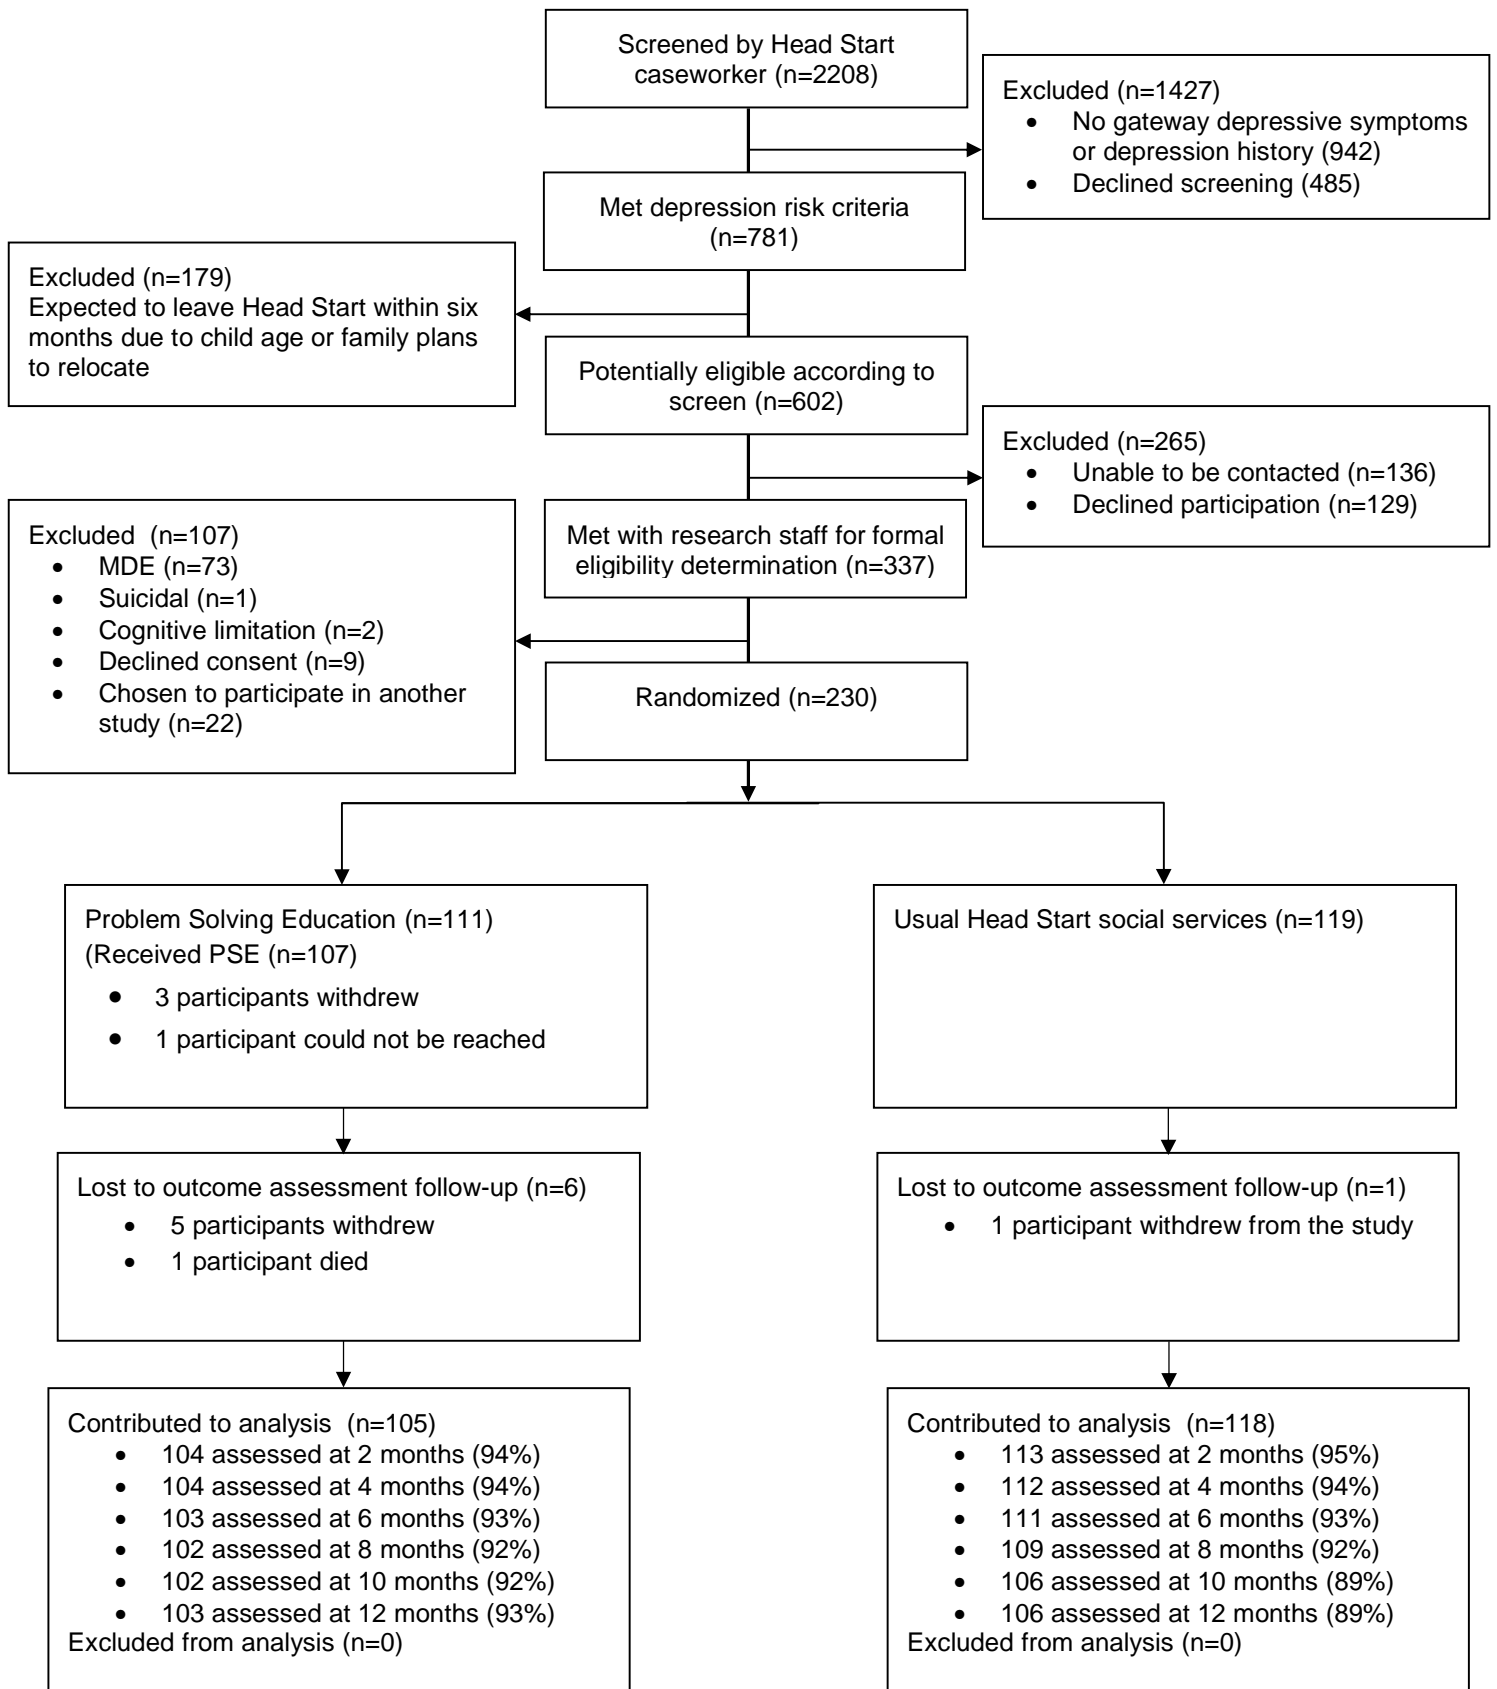

Supplement: appi.ps.201800173.ds001.pdf [file appi.ps.201800173.ds001.pdf]
